# Supplementary material
Source: publisher site journal article supplement (https://www.dovepress.com/article/324467)
Supplement: Supplementary file 1 [file get_supplementary_file.php]

**Supplementary material**

**TRONARTO: a randomized, placebo-controlled study of tiotropium/olodaterol delivered via soft mist inhaler in COPD patients stratified by peak inspiratory flow**

Donald A. Mahler, Andrea Ludwig-Sengpiel, Gary T. Ferguson, Alberto de la Hoz, John Ritz, Asif Shaikh, Henrik Watz

**Supplementary Table 1: FEV1 AUC0–3h and trough FEV1 adjusted for age, gender and disease severity**

|  | **T/O** | **Placebo** | **Treatment difference** | **P-value** |
| --- | --- | --- | --- | --- |
| **FEV1 AUC0–3h*** |  |  |  |  |
| PIF <60 L/min, mean (mL) (95% CI) | 232 (168–295) | –69 (–130 to –8) | 301 (210–391) | <0.0001 |
| PIF ≥60 L/min, mean (95% CI) | 327 (265–390) | 18 (–43–78) | 310 (222–398) | <0.0001 |
| **Trough FEV1†** |  |  |  |  |
| PIF <60 L/min, mean (mL) (95% CI) | 87 (25–149) | –99 (–159 to –39) | 186 (98–274) | <0.0001 |
| PIF ≥60 L/min, mean (95% CI) | 176 (116–236) | –39 (–97–19) | 215 (131–299) | <0.0001 |

*The adjusted means are obtained from fitting an ANCOVA model including treatment, continuous baseline FEV1 AUC0–3h, age, gender and disease severity as fixed effects.

†The adjusted means are obtained from fitting an MMRM model including treatment by visit and continuous baseline FEV1 by visit, age, gender and disease severity as fixed effects.

ANCOVA, analysis of covariance; AUC0–3h, area under the curve 0–3 hours; CI, confidence interval; FEV1, forced expiratory volume in 1 second; MMRM, mixed model with repeated measures; T/O, tiotropium/olodaterol.

**Supplementary Table 2: Adjusted mean percentage improvements in FEV1 AUC0–3h and trough FEV1, by PIF subgroup, comparison T/O versus placebo after 4 weeks of treatment**

|  | **Percent change from baseline*, % ± SE** | **95% CI** | **P-value** |
| --- | --- | --- | --- |
| **FEV1 AUC0–3h†** |  |  |  |
| PIF <45 L/min (n=22) | 28.87 ± 10.59 | 6.71–51.02 | 0.0134 |
| PIF 45–<60 L/min (n=66) | 23.12 ± 4.18 | 14.77–31.47 | <0.0001 |
| PIF 60–<80 L/min (n=36) | 21.75 ± 4.33 | 12.93–30.57 | <0.0001 |
| PIF ≥80 L/min (n=57) | 26.02 ± 4.86 | 16.26–35.77 | <0.0001 |
| **Trough FEV1‡** |  |  |  |
| PIF <45 L/min (n=26) | 18.49 ± 9.54 | –1.25–38.23 | 0.0650 |
| PIF 45–<60 L/min (n=73) | 12.22 ± 4.05 | 4.13–20.31 | 0.0036 |
| PIF 60–<80 L/min (n=41) | 15.01 ± 3.64 | 7.61–22.41 | 0.0002 |
| PIF ≥80 L/min (n=59) | 17.23 ± 4.30 | 8.61–25.84 | 0.0002 |

*Values are for tiotropium/olodaterol versus placebo, by PIF subgroup.

†The adjusted means (SE) are obtained from fitting an ANCOVA model including treatment and continuous baseline FEV1.

‡The adjusted means (SE) are obtained from fitting an MMRM model including treatment by visit and continuous baseline FEV1 by visit as fixed effects and an unstructured covariance structure for within subject variation with Kenward−Roger approximation for denominator degrees of freedom.

ANCOVA, analysis of covariance; AUC0–3h, area under the curve 0–3 hours; CI, confidence interval; FEV1, forced expiratory volume in 1 second; MMRM, mixed model with repeated measures; PIF, peak inspiratory flow; SE, standard error; T/O, tiotropium/olodaterol.

**Supplementary Table 3: FEV1 AUC0–3h and trough FEV1 adjusted for missing data**

|  | **T/O** | **Placebo** | **Treatment difference** | **P-value** |
| --- | --- | --- | --- | --- |
| **FEV1 AUC0–3h** |  |  |  |  |
| PIF <60 L/min, mean (mL) (95% CI) | 230 (169–291) | –61 (–121 to –1) | 291 (203–378) | <0.0001 |
| PIF ≥60 L/min, mean (95% CI) | 326 (265–387) | 18 (–40–76) | 307 (222–393) | <0.0001 |
| **Trough FEV1** |  |  |  |  |
| PIF <60 L/min, mean (mL) (95% CI) | 93 (33–154) | –94 (–153 to –34) | 187 (100–273) | <0.0001 |
| PIF ≥60 L/min, mean (95% CI) | 176 (118–235) | –38 (–95–19) | 214 (131–298) | <0.0001 |

Missing data are imputed using Markov Chain Monte Carlo including treatment, baseline FEV1, age, gender, disease severity, smoking, prior exacerbations, country, Weeks 3 and 4 trough FEV1 change from baseline and Week 4 change from baseline FEV1 AUC0-3h.

AUC, area under the curve; CI, confidence interval; FEV1, forced expiratory volume in 1 second; T/O, tiotropium/olodaterol.

**Supplementary Table 4: NCT04553842 trial sites**

|  | Site name | Location |
| --- | --- | --- |
| 1 | SEC Lung | Andalusia, Alabama, United States, 36420 |
| 2 | Jasper Summit Research, LLC | Jasper, Alabama, United States, 35501 |
| 3 | Meris Clinical Research | Brandon, Florida, United States, 33511 |
| 4 | Clinical Research of West Florida, Inc. | Clearwater, Florida, United States, 33765 |
| 5 | Clinical Research Specialists LLC | Kissimmee, Florida, United States, 34746 |
| 6 | Clinical Research of West Florida, Inc. | Tampa, Florida, United States, 33606 |
| 7 | Best Clinical Trials, LLC | New Orleans, Louisiana, United States, 70115 |
| 8 | Infinity Medical Research | North Dartmouth, Massachusetts, United States, 02747 |
| 9 | Pulmonary Research Institute of Southeast Michigan | Farmington Hills, Michigan, United States, 48152 |
| 10 | Minnesota Lung Center and Sleep Institute | Edina, Minnesota, United States, 55435 |
| 11 | Minnesota Lung Center | Woodbury, Minnesota, United States, 55125 |
| 12 | Valley Regional Hospital | Claremont, New Hampshire, United States, 03743 |
| 13 | CHEAR Center LLC | Bronx, New York, United States, 10455 |
| 14 | North Carolina Clinical Research | Raleigh, North Carolina, United States, 27607 |
| 15 | Southeastern Research Center | Winston-Salem, North Carolina, United States, 27103 |
| 16 | Bernstein Clinical Research Center | Cincinnati, Ohio, United States, 45231 |
| 17 | Lowcountry Lung and Critical Care | Charleston, South Carolina, United States, 29406 |
| 18 | Carolina Medical Research | Clinton, South Carolina, United States, 29325 |
| 19 | VitaLink Research -Gaffney | Gaffney, South Carolina, United States, 29340 |
| 20 | Vitalink Research - Spartansburg | Spartanburg, South Carolina, United States, 29303 |
| 21 | Diagnostics Research Group | San Antonio, Texas, United States, 78229 |
| 22 | Klinische Forschung Berlin GbR | Berlin, Germany, 10787 |
| 23 | IKF Pneumologie GmbH & Co. KG | Frankfurt, Germany, 60596 |
| 24 | Pneumologisches Forschungsinstitut an der LungenClinic Grosshansdorf GmbH | Grosshansdorf, Germany, 22927 |
| 25 | Hamburger Institut für Therapieforschung GmbH (HIT) | Hamburg, Germany, 20354 |
| 26 | KLB Gesundheitsforschung Lübeck GmbH | Lübeck, Germany, 23552 |
